# Supplementary material for: Large case-control study indicates no association of KIR genotype and risk of developing acute myeloid leukemia
Source: PubMed Central journal article supplement — Blood Adv. 2023 Jan 26;7(13):2994–3004. doi: 10.1182/bloodadvances.2022008514 (PMC10320196; doi:10.1182/bloodadvances.2022008514), 2023-01-26
Supplement: BLOODA_ADV-2022-008514-mmc2.pdf [file BLOODA_ADV-2022-008514-mmc2.pdf]

# Supplemental Material

## Supplemental Table S1

*KIR2DS4* genotype

| Classifier                                              | N pos AML pts<br>(N total AML<br>pts) | Portion of<br>pos AML pts | N pos control<br>(N total control) | Portion of<br>pos control | P-value | Adjusted<br>p-value |
|---------------------------------------------------------|---------------------------------------|---------------------------|------------------------------------|---------------------------|---------|---------------------|
| <b><i>KIR2DS4</i> full-length and truncated version</b> |                                       |                           |                                    |                           |         |                     |
| <i>KIR2DS4</i> f/f                                      | 266 (1689)                            | 0.157                     | 7710 (51890)                       | 0.149                     | 0.328   | 1.000               |
| <i>KIR2DS4</i> f/v                                      | 310 (1689)                            | 0.184                     | 10546 (51890)                      | 0.203                     | 0.051   | 0.204               |
| <i>KIR2DS4</i> v/v                                      | 893 (1689)                            | 0.559                     | 27121 (51890)                      | 0.523                     | 0.642   | 1.000               |
| Others°                                                 | 220 (1689)                            | 0.130                     | 6513 (51890)                       | 0.126                     | 0.589   | 1.000               |

° ... ambiguous sequencing results (no allele information, new alleles, ...)

**Supplemental Table S2**

See excel file

### Supplemental Table S3

KIR-ligand groups: HLA-class I ligands C1, C2, Bw4-80I, and Bw4-80T

| Classifier                                                                                                  | N pos AML pts<br>(N total AML pts) | Portion of<br>pos AML pts | N pos control<br>(N total control) | Portion of<br>pos control | P-value | Adjusted<br>p-value |
|-------------------------------------------------------------------------------------------------------------|------------------------------------|---------------------------|------------------------------------|---------------------------|---------|---------------------|
| <b>HLA-C ligands for <i>KIR2DL1</i>, <i>2DL2</i>, <i>2DL3</i>   overall chi square test p-value = 0.012</b> |                                    |                           |                                    |                           |         |                     |
| C1/C1                                                                                                       | 608 (1678)                         | 0.362                     | 19838 (50312)                      | 0.394                     | 0.009   | 0.027               |
| C1/C2                                                                                                       | 833 (1678)                         | 0.496                     | 24241 (50312)                      | 0.482                     | 0.249   | 0.746               |
| C2/C2                                                                                                       | 237 (1678)                         | 0.141                     | 6233 (50312)                       | 0.124                     | 0.037   | 0.112               |
| <b>HLA-B ligands for <i>KIR3DL1</i>   overall chi square test p-value = 0.042</b>                           |                                    |                           |                                    |                           |         |                     |
| Bw4-80I/Bw4-80I                                                                                             | 64 (1685)                          | 0.038                     | 1274 (50999)                       | 0.025                     | 0.001   | 0.007               |
| Bw4-80I/Bw4-80T                                                                                             | 113 (1685)                         | 0.067                     | 3510 (50999)                       | 0.069                     | 0.816   | 1.000               |
| Bw4-80I/Bw6                                                                                                 | 331 (1685)                         | 0.196                     | 10296 (50999)                      | 0.202                     | 0.605   | 1.000               |
| Bw4-80T/Bw4-80T                                                                                             | 77 (1685)                          | 0.046                     | 2311 (50999)                       | 0.045                     | 0.988   | 1.000               |
| Bw4-80T/Bw6                                                                                                 | 454 (1685)                         | 0.269                     | 13624 (50999)                      | 0.267                     | 0.856   | 1.000               |
| Bw6/Bw6                                                                                                     | 646 (1685)                         | 0.383                     | 19984 (50999)                      | 0.392                     | 0.499   | 1.000               |

## Supplemental Table S4

KIR/KIR-ligand counts and scores tested as ordinal category or dichotomized.

| Classifier                                                                                                           | N pos AML pts<br>(N total AML pts) | Portion of<br>pos AML pts | N pos control<br>(N total control) | Portion of<br>pos control | P-value | Adjusted<br>p-value |
|----------------------------------------------------------------------------------------------------------------------|------------------------------------|---------------------------|------------------------------------|---------------------------|---------|---------------------|
| <b>inhibitory KIR/KIR-ligand count (Boelen <i>et al.</i>)</b>                                                        |                                    |                           |                                    |                           |         |                     |
| 1                                                                                                                    | 229 (1676)                         | 0.137                     | 7743 (49898)                       | 0.155                     | 0.042   | 0.169               |
| 2                                                                                                                    | 615 (1676)                         | 0.367                     | 17644 (49898)                      | 0.354                     | 0.272   | 1.000               |
| 3                                                                                                                    | 588 (1676)                         | 0.351                     | 17915 (49898)                      | 0.359                     | 0.508   | 1.000               |
| 4                                                                                                                    | 244 (1676)                         | 0.146                     | 6596 (49898)                       | 0.132                     | 0.120   | 0.481               |
| <b>inhibitory KIR/KIR-ligand score (Boelen <i>et al.</i>)</b>                                                        |                                    |                           |                                    |                           |         |                     |
| 0.5                                                                                                                  | 2 (1676)                           | 0.001                     | 33 (49898)                         | 0.001                     | 0.729   | 1.000               |
| 0.75                                                                                                                 | 165 (1676)                         | 0.098                     | 5742 (49898)                       | 0.115                     | 0.039   | 0.390               |
| 1.0                                                                                                                  | 62 (1676)                          | 0.037                     | 1968 (49898)                       | 0.039                     | 0.657   | 1.000               |
| 1.5                                                                                                                  | 30 (1676)                          | 0.018                     | 749 (49898)                        | 0.015                     | 0.394   | 1.000               |
| 1.75                                                                                                                 | 415 (1676)                         | 0.247                     | 12665 (49898)                      | 0.254                     | 0.585   | 1.000               |
| 2.0                                                                                                                  | 170 (1676)                         | 0.101                     | 4230 (49898)                       | 0.085                     | 0.018   | 0.184               |
| 2.5                                                                                                                  | 90 (1676)                          | 0.054                     | 2356 (49898)                       | 0.047                     | 0.242   | 1.000               |
| 2.75                                                                                                                 | 460 (1676)                         | 0.274                     | 14572 (49898)                      | 0.292                     | 0.126   | 1.000               |
| 3.0                                                                                                                  | 38 (1676)                          | 0.022                     | 987 (49898)                        | 0.020                     | 0.455   | 1.000               |
| 3.75                                                                                                                 | 244 (1676)                         | 0.145                     | 6596 (49898)                       | 0.132                     | 0.120   | 1.000               |
| <b>Inhibitory KIR/KIR-ligand matches (Rafei <i>et al.</i>)   overall chi square test p-value = 0.355</b>             |                                    |                           |                                    |                           |         |                     |
| Inhibitory Favorable <sup>§</sup>                                                                                    | 629 (1581)                         | 0.398                     | 17283 (42171)                      | 0.410                     | 0.355   |                     |
| Inhibitory Unfavorable                                                                                               | 952 (1581)                         | 0.602                     | 24888 (42171)                      | 0.590                     |         |                     |
| <b>Activating KIR/KIR-ligand matches<sup>§</sup> (Rafei <i>et al.</i>)   overall chi square test p-value = 0.128</b> |                                    |                           |                                    |                           |         |                     |
| Activating Favorable <sup>#</sup>                                                                                    | 618 (1584)                         | 0.390                     | 17274 (42171)                      | 0.410                     | 0.128   |                     |
| Activating Unfavorable                                                                                               | 966 (1584)                         | 0.610                     | 24897 (42171)                      | 0.590                     |         |                     |

§ ... <3 inhibitory KIR/KIR-ligand matches; # ... ≥1 activating KIR/KIR-ligand match;

### Supplemental Table S5

KIR/KIR-ligand counts and scores tested as a continuous variable.

| Coefficient                                                                                | Estimate (log odds change) | N total AML pts | N total control | P-value |
|--------------------------------------------------------------------------------------------|----------------------------|-----------------|-----------------|---------|
| <b>Continuous inhibitory KIR/KIR-ligand count including KIR3DL1 (Boelen <i>et al.</i>)</b> |                            |                 |                 |         |
| Functional iKIR Count (continuous)                                                         | -0.045                     | 1679            | 49898           | 0.094   |
| Inhibitory Score (continuous)                                                              | -0.049                     | 1679            | 49915           | 0.076   |
| <b>Additive inhibitory / activating KIR/KIR-Ligand Model (Krieger <i>et al.</i>)</b>       |                            |                 |                 |         |
| wKIR Score (continuous)                                                                    | -0.034                     | 1581            | 42171           | 0.478   |
| ImKIR-Score (continuous)                                                                   | -0.045                     | 1581            | 42177           | 0.298   |

Continuous models by Boelen *et al.* and Krieger *et al.*, individually fitted logistic regression models with patient / control label as response, and the score or count as the single continuous explanatory variable.

**Supplemental Table S6.**

KIRs and their ligands considered for the calculation of the respective model.

|                | KIR/KIR-ligand model published by...      |                                                |                                          |                                                |                                                              |                                          |
|----------------|-------------------------------------------|------------------------------------------------|------------------------------------------|------------------------------------------------|--------------------------------------------------------------|------------------------------------------|
|                | Venstrom <i>et al.</i> ,<br>NEJM,<br>2012 | Boudreau <i>et al.</i> ,<br>J Immunol,<br>2016 | Boudreau <i>et al.</i> ,<br>JCO,<br>2017 | Boelen <i>et al.</i> ,<br>Sci Immunol,<br>2018 | Rafei <i>et al.</i> ,<br>J Clin Oncol,<br>2019               | Krieger <i>et al.</i> ,<br>BBMT,<br>2019 |
| Inhibitory KIR | KIR ligand                                |                                                |                                          |                                                |                                                              |                                          |
| <i>KIR2DL1</i> |                                           |                                                |                                          | C2                                             | C2                                                           | C2                                       |
| <i>KIR2DL2</i> |                                           |                                                |                                          | C1 (strong)<br>C2 (weak)                       | C1, B46:01, B73:01                                           | C1                                       |
| <i>KIR2DL3</i> |                                           |                                                |                                          | C1                                             | C1, B46:01, B73:01                                           | C1                                       |
| <i>KIR3DL1</i> |                                           | Bw4 80-I/T                                     | Bw4 80-I/T                               | Bw4                                            | Bw4                                                          | Bw4                                      |
| <i>KIR3DL2</i> |                                           |                                                |                                          |                                                | A3, A11                                                      | A3, A11                                  |
| Activating KIR | KIR ligand                                |                                                |                                          |                                                |                                                              |                                          |
| <i>KIR2DS1</i> | C2/C2 (hyporesp.)<br>C1+ (responsive)     |                                                | C2/C2 vs<br>C1+                          |                                                | C02:02, C04:01, C05:01,<br>C06:02, C17:01, C18:02            | C2                                       |
| <i>KIR2DS2</i> |                                           |                                                |                                          |                                                | A11:01                                                       | A11                                      |
| <i>KIR2DS4</i> |                                           |                                                |                                          |                                                | C01:02, C02:02, C05:01,<br>C14:02, C16:01,<br>A11:01, A11:02 | A11                                      |
| <i>KIR2DS5</i> |                                           |                                                |                                          |                                                |                                                              | C2                                       |
| <i>KIR3DS1</i> |                                           |                                                |                                          |                                                | B27:05, Bw4 80-T                                             |                                          |

Supplemental Figure S1

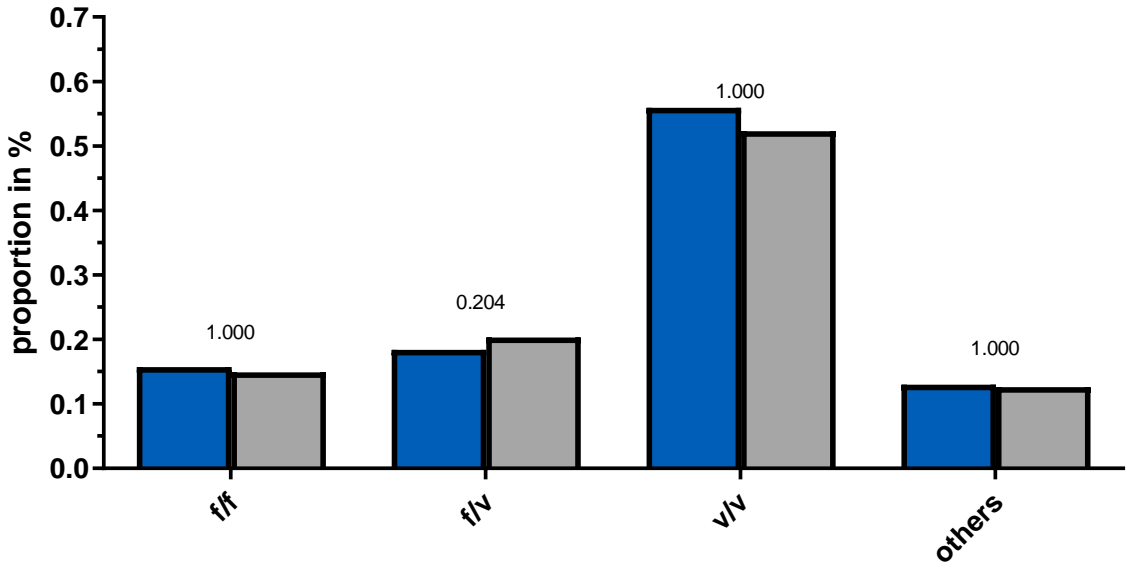

Frequencies of *KIR2DS4* genotypes. Blue columns are displaying frequencies of patients with AML and gray columns are displaying the control group. Adjusted p-values are depicted above the pairs of columns. f ... full-length; v...truncated variant

Supplemental Figure S2

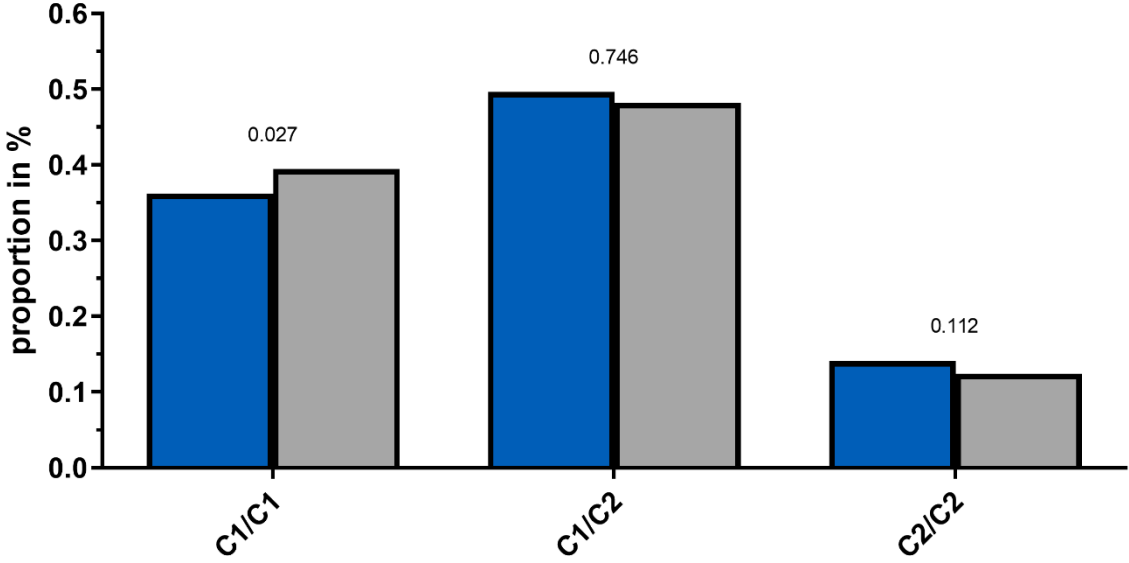

Frequencies of *HLA-C1/C2* KIR ligands. Blue columns are displaying frequencies of patients with AML and gray columns are displaying the control group. Adjusted p-values are depicted above the pairs of columns.



Supplemental Figure S3

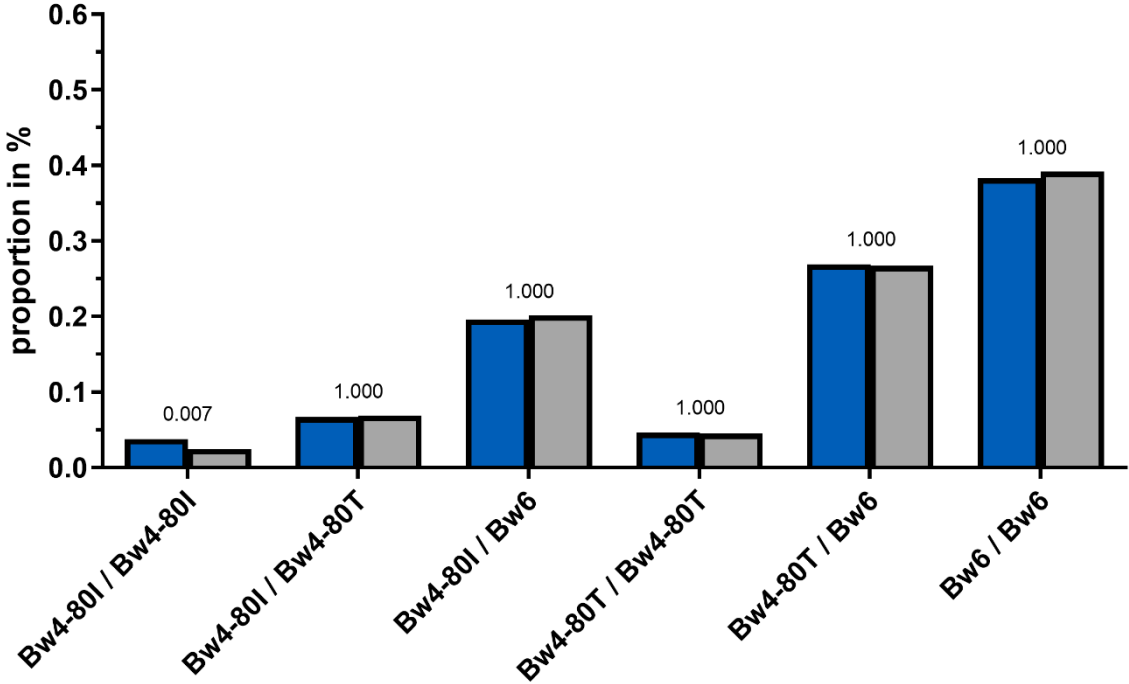

Frequencies of *HLA-Bw4/Bw6* KIR-ligands. Blue columns are displaying frequencies of patients with AML and gray columns are displaying the control group. Adjusted p-values are depicted above the pairs of columns.

### Supplemental Figure S4

A) Inhibitory KIR/KIR-ligand count (Boelen *et al.*)

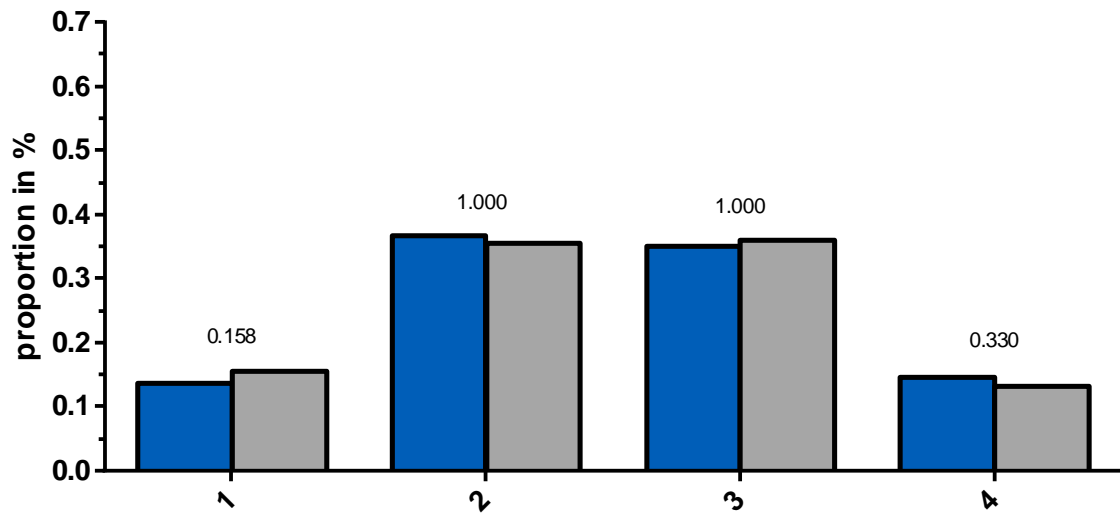

B) Inhibitory KIR/KIR-ligand score (Boelen *et al.*)

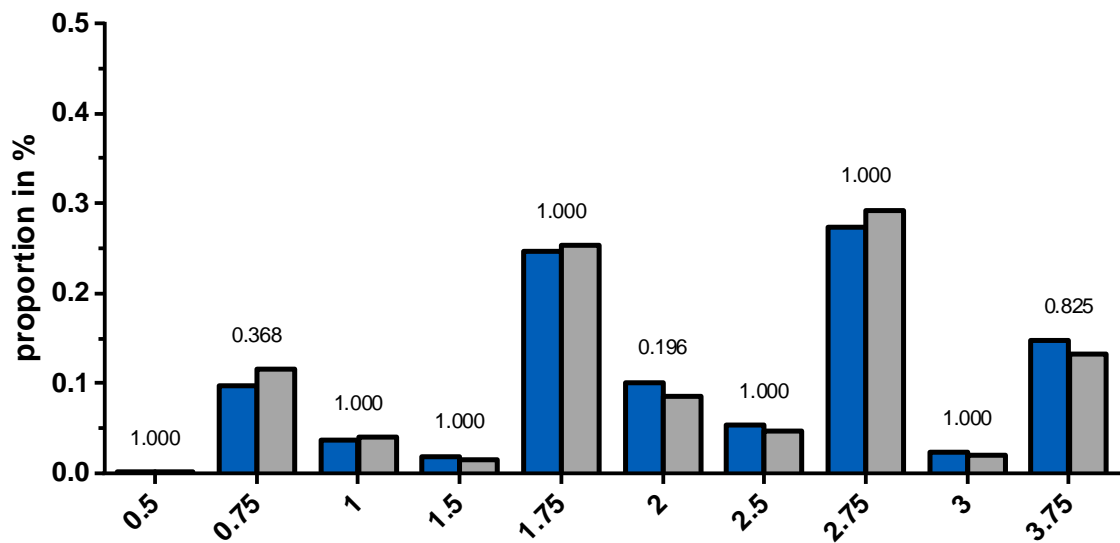

C) Inhibitory KIR/KIR-ligand matches (Rafei *et al.*)

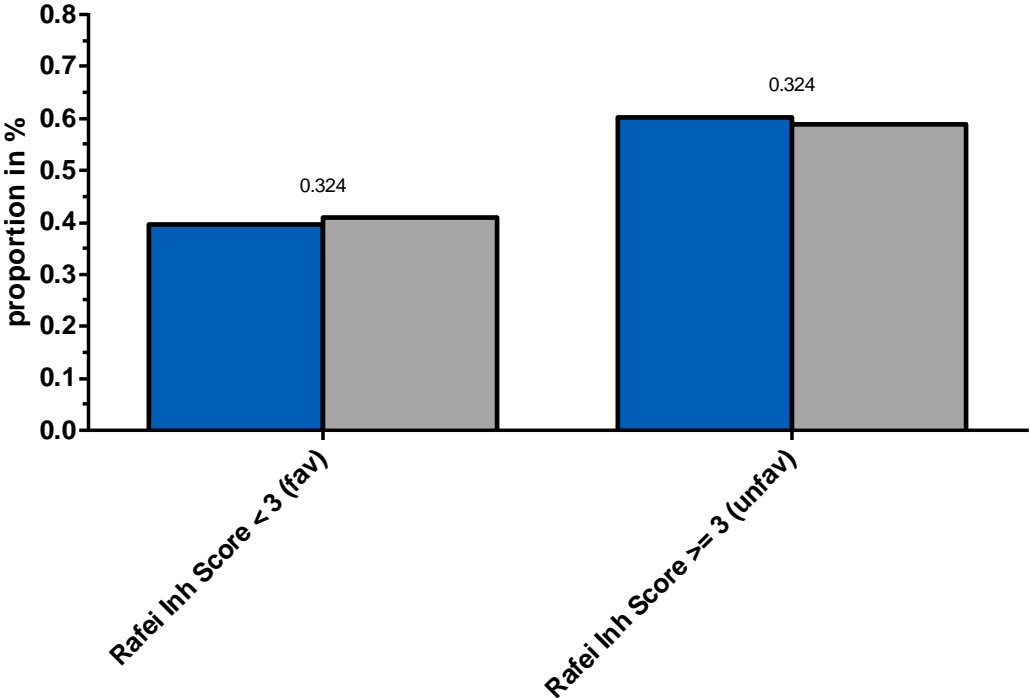

D) Activating KIR/KIR-ligand matches (Rafei *et al.*)

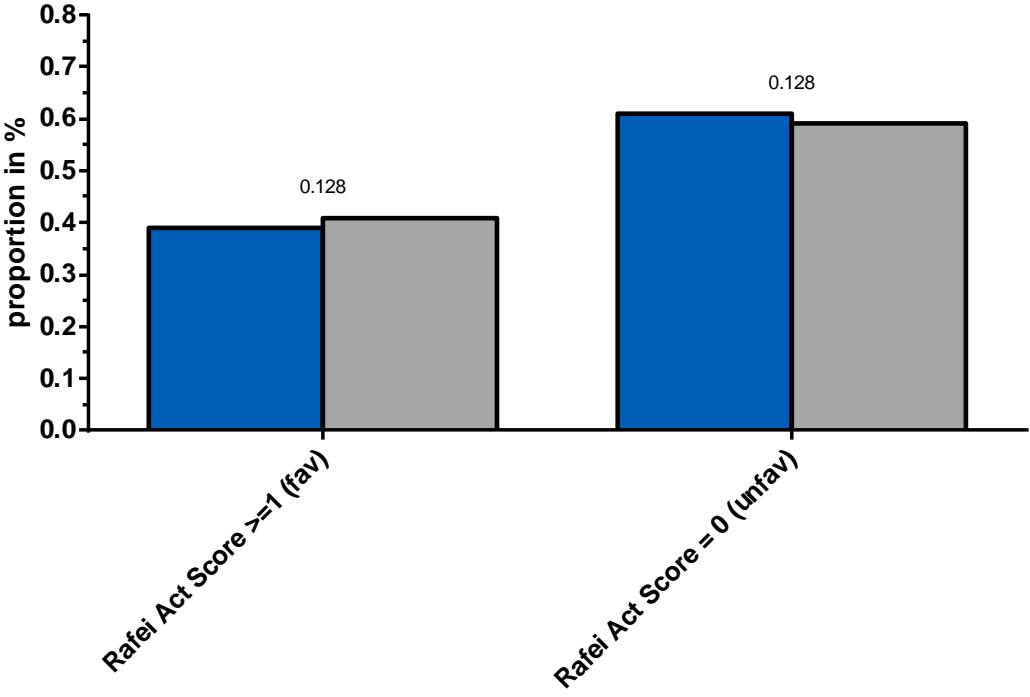

Frequencies of scores according to four additive KIR/KIR-ligand models. Inhibitory KIR/KIR-ligand count (A), and inhibitory KIR/KIR-ligand score (B), both according to Boelen *et al.* (1), including KIR3DL1/HLA-Bw4 and considering KIR2DL2 and KIR2DL3 separately. Inhibitory (C) and activating (D) score by Rafei *et al.* (2) with an unfavorable inhibitory score defined by the presence of  $\geq 3$  inhibitory KIR/KIR-ligand matches, and an unfavorable activating score defined by the absence of activating KIR/KIR-ligand matches, the truncated version of KIR2DS4 is not considered as an activating KIR. Blue columns are displaying frequencies of patients with AML and gray columns are displaying the control group. Adjusted p-values are depicted above the pairs of columns.

## References

1. Boelen L, Debebe B, Silveira M, Salam A, Makinde J, Roberts CH, et al. Inhibitory killer cell immunoglobulin-like receptors strengthen CD8+ T cell–mediated control of HIV-1, HCV, and HTLV-1. *Sci Immunol*. 2018;3:eaao2892.
2. Rafei H, Fernández-Viña M, Carmazzi Y, Moore B, Willis D, Basar R, et al. Role of killer cell immunoglobulin-like receptor (KIR)-ligand interactions to prevent relapse in patients (pts) receiving matched unrelated stem cell transplant (SCT) for acute myeloid leukemia (AML). *J Clin Oncol*. 2019;
